# Supplementary material
Source: PubMed Central journal article supplement (PMC3107712)

## Supplementary Information

### Targeting the Akt/mTOR pathway in Brca1-deficient cancers

Tao Xiang<sup>1</sup>, Yunhe Jia<sup>1</sup>, David Sherris<sup>2</sup>, Shunqiang Li<sup>3</sup>, Hanlin Wang<sup>4</sup>, Dongsu Lu<sup>5</sup> and Qin Yang<sup>1\*</sup>

<sup>1</sup>Department of Radiation Oncology, <sup>3</sup>Department of Medicine and Siteman Cancer Center, <sup>5</sup>Department of Pathology and Immunology, Washington University School of Medicine, Saint Louis, MO 63108; <sup>2</sup>Paloma Pharmaceuticals, Jamaica Plain, MA; <sup>4</sup>Department of Pathology and Laboratory Medicine, Cedars-Sinai Medical Center, Los Angeles, CA 90048.

**Supplementary Table 1.** pAkt<sup>S473</sup> and Brca1 expression in breast cancer samples with clinical-pathological features

|                       | pAkt <sup>S473</sup> |              | Brca1        |              |
|-----------------------|----------------------|--------------|--------------|--------------|
|                       | Positive (%)         | Negative (%) | Negative (%) | Positive (%) |
| Total (n=101)         | 62 (61.39)           | 39 (38.61)   | 70 (69.31)   | 31 (30.69)   |
| Grade                 |                      |              |              |              |
| T1 (n=69)             | 39 (56.52)           | 30 (43.48)   | 46 (66.67)   | 23 (33.33)   |
| T2 (n=20)             | 15 (75.00)           | 5 (25.00)    | 17 (85.00)   | 3 (15.00)    |
| T3 (n=12)             | 8 (66.67)            | 4 (33.33)    | 7 (58.33)    | 5 (41.67)    |
| Tissue type           |                      |              |              |              |
| Ductal CA (n=75)      | 45 (60.00)           | 30 (40.00)   | 53 (70.67)   | 22 (29.33)   |
| Lobular CA (15)       | 10 (66.67)           | 5 (33.33)    | 10 (66.67)   | 5 (33.33)    |
| Mammary CA (n=11)     | 7 (63.64)            | 4 (36.36)    | 5 (45.45)    | 6 (54.55)    |
| Lymph node metastasis |                      |              |              |              |
| None (n=58)           | 34 (58.62)           | 24 (41.38)   | 39 (67.24)   | 19 (32.76)   |
| Some (n=43)           | 28 (65.12)           | 15 (34.88)   | 31 (72.09)   | 12 (27.91)   |
| Age                   |                      |              |              |              |
| <59 (n=53)            | 32 (60.38)           | 21 (39.62)   | 34 (64.15)   | 19 (35.85)   |
| >60 (n=48)            | 30 (62.50)           | 18 (37.50)   | 36 (75.00)   | 12 (25.00)   |

**Supplementary Table 2.** pAkt<sup>S473</sup> and Brca1 expression in relation to *PIK3CA* mutation and Ki67 expression

| N=101         | BRCA1 |          |          | pAKT     |          |      | BRCA1-negative pAKT-positive |      |  |
|---------------|-------|----------|----------|----------|----------|------|------------------------------|------|--|
|               | n     | Positive | Negative | Positive | Negative | P    | 50                           | P    |  |
| <i>PIK3CA</i> |       |          |          |          |          |      |                              |      |  |
| Wild-type     | 55    | 12       | 43       | 26       | 29       | 0.08 | 26                           | 0.8  |  |
| Mutant        | 44    | 19       | 25       | 34       | 10       |      | 23                           |      |  |
| Unknown       | 2     |          | 2        | 2        |          |      | 1                            |      |  |
| <i>Ki67</i>   |       |          |          |          |          |      |                              |      |  |
| Positive      | 61    | 14       | 47       | 43       | 18       | 0.06 | 30                           | 0.06 |  |
| Negative      | 36    | 16       | 20       | 17       | 19       |      | 18                           |      |  |
| Unknown       | 4     | 1        | 3        | 2        | 2        |      | 2                            |      |  |

## Supplementary figure legends

**Supplementary Figure 1. Immunohistochemistry staining of pAkt (S473) and Brca1 in breast cancer tissue samples.** Upper panel showed the different intensity of pAkt (S473) and lower panel for Brca1. Original magnification 200×.

**Supplementary Figure 2. Mapping the Brca1 binding domains of Akt1.** MEFs were transfected with HA-tagged full-length or deletion fragments from three functional domains of Akt1. The cell lysates were incubated with GST-Brca1 BRCT protein. The complex was eluted and analyzed by Western blotting (WB) with anti-GST or anti-HA antibody.

**Supplementary Figure 3. Haematoxylin and Eosin stain for *Brca1<sup>tr/tr</sup>* MEF graft tumors in mice.** The xenograft tumors were stained as homogeneous cell mass. The tumor phenotypes did not show difference in *Brca1<sup>tr/tr</sup>* and *Brca1<sup>tr/tr</sup>* with shAkt expression xenograft tumors.

Supplementary Fig. 1

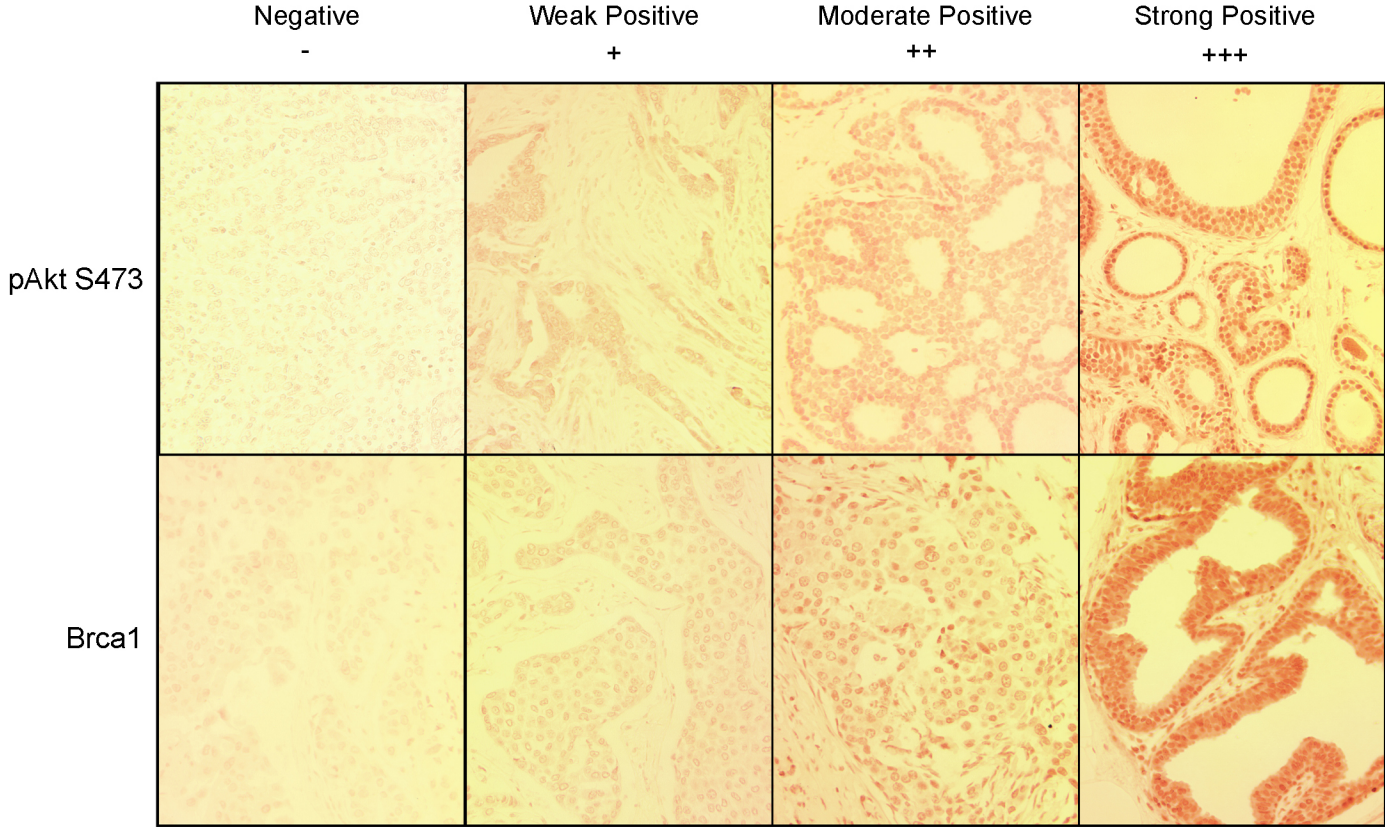

Supplementary Fig. 2

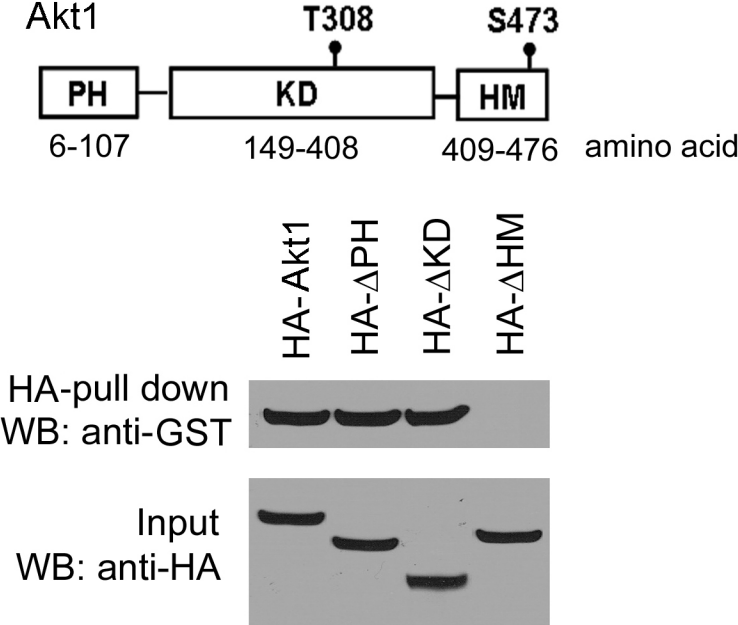

Supplementary Fig.3

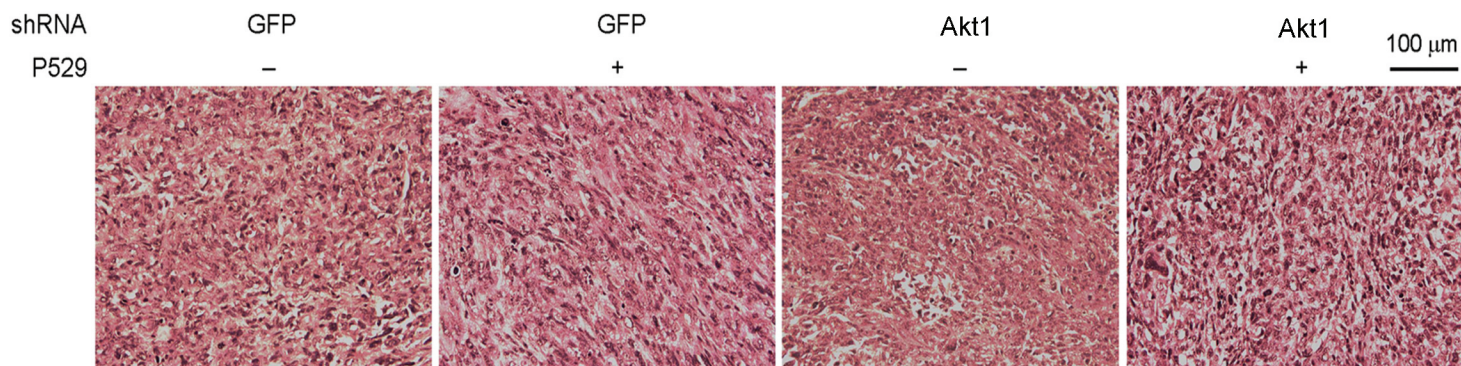

Supplement: NIHMS296171-supplement-Supplementary_information.pdf [file NIHMS296171-supplement-Supplementary_information.pdf]
